# Supplementary material for: Microfluidic platform for 3D cell culture with live imaging and clone retrieval
Source: Royal Society of Chemistry journal article supplement (doi:10.1039/d0lc00165a), 2020-01-01
Supplement: d0lc00165a1.pdf [file d0lc00165a1.pdf]

- 1 **Figure S1.** Schematics of the microfluidic device. Dimensions of key components are provided.  
2 Traps are numbered from left to right (1-16).  
3  
4 **Figure S2.** CAD file microfluidic chip components.  
5  
6 **Table S1.** Template for matrix screen. In the 'Solutions' tab, the instructions detail how to  
7 prepare the dilutions of the matrix components (agarose, fibrinogen, thrombin and laminin) and  
8 cells. The "Plate setup" tab contains instructions on how to pipette the different solutions to  
9 obtain all possible hydrogel conditions.  
10  
11 **Table S2.** Operating conditions of the microfluidic chip, detailing media flow, inlet and valve use  
12 for each operation.  
13  
14 **Table S3.** Troubleshooting. Table contains a list of the common issues encountered and steps  
15 taken to overcome them.  
16  
17  
18
