# Supplementary material for: Microfluidic platform for 3D cell culture with live imaging and clone retrieval
Source: Royal Society of Chemistry journal article supplement (doi:10.1039/d0lc00165a), 2020-01-01
Supplement: d0lc00165a4.xlsx [file d0lc00165a4.xlsx]

## Sheet: Solutions
CONDITIONS:
	Agarose	Fibrinogen (stock 50mg/ml)	Thrombin (stock: 50U/ml)	Laminin
	0.01	0.5mg/ml	0.25U/ml	5ng/ul
	0.0085	0.2mg/ml	0.5U/ml	2.5ng/ul
	0.007	0.075mg/ml	1U/ml
	0.005	0.025mg/ml
OUTLINE:
	6x Laminin solution, 6x fibrinogen solution and 6x cell suspension are prepared and mixed 1:1:1 in a 96-well plate (PLATE 1) according to the pattern described in the “Plate setup” tab. Separately, 2x agarose and thrombin solutions are prepared, and dispensed into the 96-well culture plate (PLATE 2), while keeping the plate at 37°C to avoid polymerisation. Using a multi-channel pipette, 50ml of P…
STEPS:	1. Prepare 6x laminin solutions.
	2. Prepare 6x fibrinogen solutions.
	3. Prepare 2x agarose solution by heating up to 80°C and cooling down to 37°C.
	4. Add 2x Thrombin to agarose solution and keep at 37°C.
	5. Dispense 50ml of agarose/thrombin solution to each well of a 96-well plate (PLATE 2), while keeping the 96-well plate on top of a hotplate set at 37°C to avoid premature polymerisation.
	Dispense the different agarose/thrombin concentration solutions as indicated by the template in the "Plate setup" tab. Prepare two plates in parallel.
	6. Split cells and prepare 6x cell suspension.
	7. On a fresh 96-well plate (PLATE 1), pipette 50ml each of laminin solution, fibrinogen solution and cell suspension following the template on "Plate setup" tab. Each well should now contain a 2x solution of Laminin, fibrinogen and cells.
	8. With a multi-channel pipette, mix 2x laminin/fibrinogen/cell mixture and transfer to wells containing agarose/thrombin, matching the wells (i.e. PLATE 1, A1 to PLATE 2, A1…etc).
	9. While keeping at 37°C, pipette up and down gently to mix contents.
	10. Polymerise agarose by incubating on ice for 15min.
	11. Top up wells with fresh N2B27.
	12. Next day, and every other day thereafter, change media to fresh N2B27.
SOLUTIONS:
Fibrinogen	Fibrinogen
	Stock solution (mg/ml)	5
					Total volume for all wells
	Final concentration (mg/ml)	ul of Fibrinogen (in 50ul) 1x	ul Fibrinogen (in 50ul) 6x	Volume N2B27 (to 50ul final)	Fibrinogen x24	N2B27 x24	TOTAL
	0.5	5	30	20	720	480	1200
	0.2	2	12	38	288	912	1200
	0.075	0.75	4.5	45.5	108	1092	1200
	0.025	0.25	1.5	48.5	36	1164	1200
Laminin	Laminin
	Stock solution (mg/ml)	1
					Total volume for all wells
	Final concentration (ng/ul)	ul of Laminin (50ul) 1x	ul of Laminin (in 50ul) 6x	Volume N2B27 (to 50ul final)	Laminin x48	N2B27 x48	TOTAL
	5	0.25	1.5	48.5	72	2328	2400
	2.5	0.125	0.75	49.25	36	2364	2400
Agarose	Low melt agarose
	For each agarose concentration, prepare 3 eppendorfs of 0.5ml each, one for each thrombin solution
	Final concentrations (%)	Volume	2x
	1	0.5ml	0.02
	0.85	0.5ml	0.017
	0.7	0.5ml	0.014
	0.5	0.5ml	0.01
Thrombin	Thrombin
	Stock solution (U/ml)	50
	Final concentration (U/ml)	ul to add to 0.5ml 2x Agarose solution
	0.25	5
	0.5	10
	1	20
Cell suspension	Cell Solution
	Number of cells/well	3500
	Total number of wells (+excess)	110
	Cell number x6	21000
	Cell number TOTAL	2310000
	N2B27 volume (ul)	5500

## Sheet: Plate setup
																		Solution concentration (final)
PLATE2		1	2	3	4	5	6	7	8	9	10	11	12
	A													Agarose				0.01
	B
	C																	0.0085
	D
	E																	0.007
	F
	G																	0.005
	H
		1	2	3	4	5	6	7	8	9	10	11	12
	A													Thrombin				0.25U/ml
	B
	C																	0.5U/ml
	D
	E																	1U/ml
	F
	G
	H
		1	2	3	4	5	6	7	8	9	10	11	12
PLATE 1	A													Fibrinogen				0.5mg/ml
	B
	C																	0.2mg/ml
	D
	E																	0.075mg/ml
	F
	G																	0.025mg/ml
	H
		1	2	3	4	5	6	7	8	9	10	11	12
PLATE 1	A													Laminin				5ng/ul
	B
	C																	2.5ng/ul
	D
	E
	F
	G
	H
