# Supplementary material for: Microfluidic platform for 3D cell culture with live imaging and clone retrieval
Source: Royal Society of Chemistry journal article supplement (doi:10.1039/d0lc00165a), 2020-01-01
Supplement: d0lc00165a5.xlsx [file d0lc00165a5.xlsx]

## Sheet: Sheet1
					Valve status (see schematic Figure S1 for reference)
Step	Operation	Media flow (ul/hr)	Time (min)	Inlet	C1	C2	C3	D2	B1	B2	B3	B4	A1	A2	A3	A4	C4
1	Ethanol wash	1500	3	Media	Closed	Closed	Open	Open	Open	Open	Open	Open	Open	Open	Open	Open	Closed
2	Ethanol wash	1500	15	Media	Closed	Open	Closed	Open	Open	Open	Open	Open	Open	Open	Open	Open	Closed
3	Ethanol wash	1500	15	Media	Open	Closed	Closed	Open	Open	Open	Open	Open	Open	Open	Open	Open	Closed
4	PBS wash	1500	3	Media	Closed	Closed	Open	Open	Open	Open	Open	Open	Open	Open	Open	Open	Closed
5	PBS wash	1500	15	Media	Closed	Open	Closed	Open	Open	Open	Open	Open	Open	Open	Open	Open	Closed
6	PBS wash	1500	15	Media	Open	Closed	Closed	Open	Open	Open	Open	Open	Open	Open	Open	Open	Closed
7	Media wash	1500	3	Media	Closed	Closed	Open	Open	Open	Open	Open	Open	Open	Open	Open	Open	Closed
8	Media wash	1500	15	Media	Closed	Open	Closed	Open	Open	Open	Open	Open	Open	Open	Open	Open	Closed
9	Media wash	1500	15	Media	Open	Closed	Closed	Open	Open	Open	Open	Open	Open	Open	Open	Open	Closed
10	Bead Inject	100	5	Beads	Open	Closed	Open	Closed	Open	Open	Open	Open	Open	Open	Open	Open	Closed
11	Media perfusion	200	Until bead removal	Media	Open	Closed	Closed	Open	Open	Open	Open	Open	Open	Open	Open	Open	Closed
12	Bead removal (e.g position 16)	200	3	Media	Closed	Open	Closed	Open	Open	Closed	Open	Closed	Closed	Open	Closed	Open	Closed
