# Supplementary material for: Microfluidic platform for 3D cell culture with live imaging and clone retrieval
Source: Royal Society of Chemistry journal article supplement (doi:10.1039/d0lc00165a), 2020-01-01
Supplement: d0lc00165a6.xlsx [file d0lc00165a6.xlsx]

## Sheet: Sheet1
Step/Issue	Throubleshooting
Microfluidic chip fabrication	Chips were inspected under the microscope for dust, especially in the valve regions
	Multiple chips were prepared for each experiment and filled with PBS
Valve integrity	Valves were connected and tested at the start of each experiment. Any leaks were readily visible as valve actuation resulted in air bubbles and loss of pressure.
Valve failure	We only observed occasional valve failure in inlets/outlets not in use (e.g. bead inlet after bead loading, etc). Outlets/inlets not in use were sealed shut with clamps to avoid backflush and valve failure.
Bubbles due to pressure/temperature differentials	Blocked unused inlets/outlets with clamps
	Placed outlet reservoir at the same level or slightly higher than the chip.
	Place microscope and all fluidics (syringe pump, outlets, etc) in heated box at 37ºC.
Spontaneous bubbles in inlet syringe	All media was pre-equilibrated in the incubator, and loaded into the microfluidic syringes for 20min before starting. Before connecting, bubbles inside the syringe were removed
	The Nemesys syringe pump was angled slightly, so the syringe openings pointed downwards. Lose bubbles floated towards the plunger reducing the chances of them entering the chip.
	A bubble trap (Fluigent) was used to trap as an additional precaution
Common causes of failure	Within 1-2hrs = valve failure; within 12hrs = bubbles in media.
Bead trapping	Since each channel can be controlled independently, it is possible to direct the beads in and out of a particular trap until the desired on is captured. In our case, we excluded empty beads (no cell), beads with clearly dead cells, and beads with multiple (3+) cells per bead.
Bead extraction	All outlets were cleared with fresh media before extracting beads of interest to ensure no extra beads remained in the system.
	Individual bead extraction depends on the ability of the valves to completely block and re-direct media flow. This was quickly ascertained during chip set up, and unsuitable chips were discarded.
Cell survival	Cell survival within chips was generally good. The following were observed causes of cell death which we took steps to minimise: bubbles and incomplete chip cleaning. Media flow was absolutely essential for survival and differentiation.
